# Supplementary material for: Plasma-derived extracellular vesicles discriminate type-1 allergy subjects from non-allergic controls
Source: PubMed Central journal article supplement — World Allergy Organ J. 2021 Sep 28;14(9):100583. doi: 10.1016/j.waojou.2021.100583 (PMC8487953; doi:10.1016/j.waojou.2021.100583), 2021-09-28
Supplement: mmc2.pdf [file mmc2.pdf]

**A4.IL.8**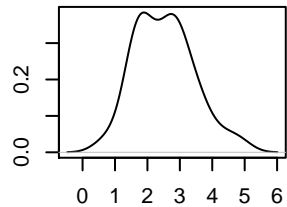

N = 29 Bandwidth = 0.4059  
Shapiro-Wilk (BH-adj.): p = 0.55

**A5.IP.10**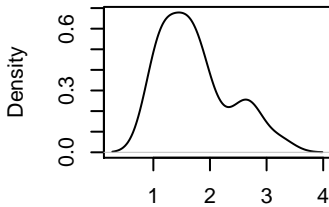

N = 27 Bandwidth = 0.248  
Shapiro-Wilk (BH-adj.): p = 0.172

**A6.Eotaxin**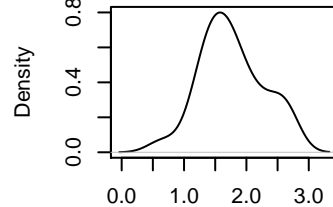

N = 27 Bandwidth = 0.2283  
Shapiro-Wilk (BH-adj.): p = 0.512

**A7.TARC**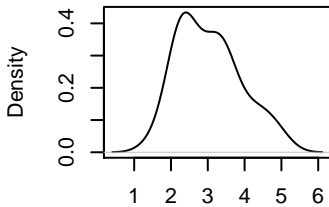

N = 29 Bandwidth = 0.3924  
Shapiro-Wilk (BH-adj.): p = 0.317

**A8.MCP.1**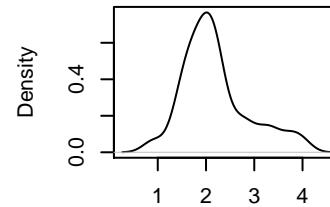

N = 29 Bandwidth = 0.217  
Shapiro-Wilk (BH-adj.): p = 0.247

**A10.Rantes**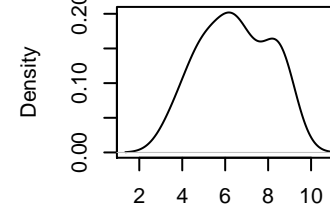

N = 29 Bandwidth = 0.7412  
Shapiro-Wilk (BH-adj.): p = 0.364

**B2.MIP.1a**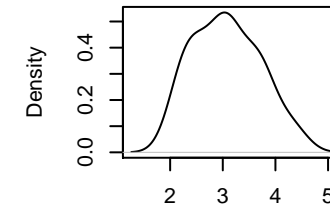

N = 28 Bandwidth = 0.2907  
Shapiro-Wilk (BH-adj.): p = 0.512

**B3.MIG**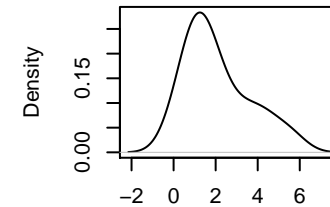

N = 16 Bandwidth = 0.7526  
Shapiro-Wilk (BH-adj.): p = 0.36

**B4.ENA.78**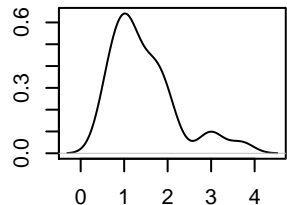

N = 29 Bandwidth = 0.2754  
Shapiro-Wilk (BH-adj.): p = 0.059

**B5.MIP.3a**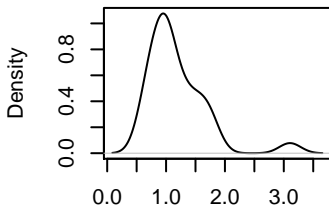

N = 28 Bandwidth = 0.1833  
Shapiro-Wilk (BH-adj.): p = 0.005

**B6.GROa**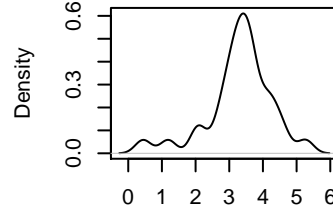

N = 29 Bandwidth = 0.2366  
Shapiro-Wilk (BH-adj.): p = 0.317

**B7.I.TAC**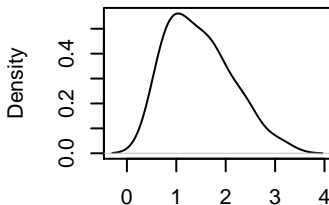

N = 29 Bandwidth = 0.2962  
Shapiro-Wilk (BH-adj.): p = 0.364

**B9.MIP.1b**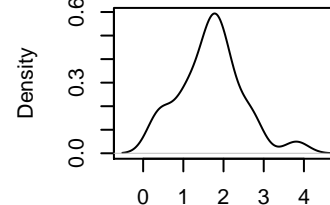

N = 27 Bandwidth = 0.2989  
Shapiro-Wilk (BH-adj.): p = 0.512

**A4.TSLP**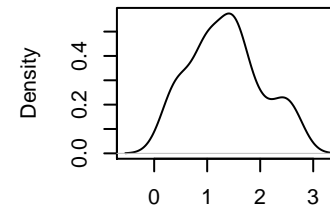

N = 27 Bandwidth = 0.2505  
Shapiro-Wilk (BH-adj.): p = 0.55

**A5.IL.1a**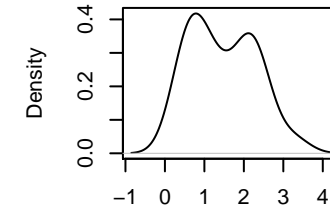

N = 24 Bandwidth = 0.396  
Shapiro-Wilk (BH-adj.): p = 0.364

**A6.IL.1b**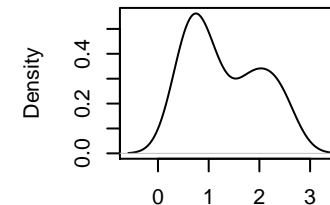

N = 27 Bandwidth = 0.3323  
Shapiro-Wilk (BH-adj.): p = 0.136

**A7.GM.CSF**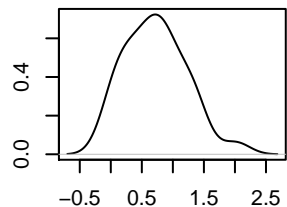

N = 29 Bandwidth = 0.2234  
Shapiro-Wilk (BH-adj.): p = 0.55

**A8.IFN.a2**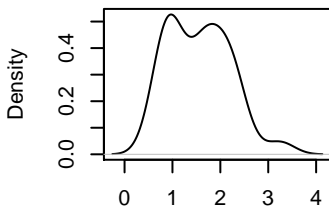

N = 29 Bandwidth = 0.2956  
Shapiro-Wilk (BH-adj.): p = 0.317

**A10.IL.23**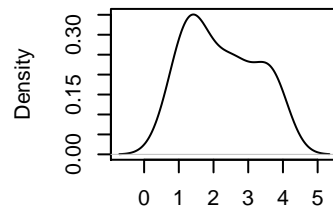

N = 28 Bandwidth = 0.4709  
Shapiro-Wilk (BH-adj.): p = 0.247

**B2.IL.12p40**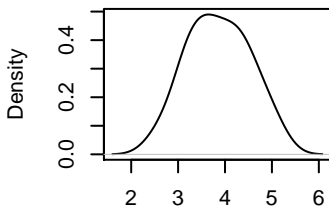

N = 24 Bandwidth = 0.3178  
Shapiro-Wilk (BH-adj.): p = 0.982

**B3.IL.12p70**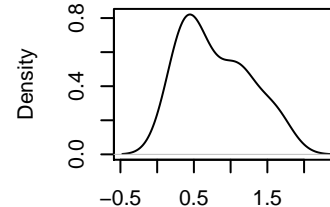

N = 20 Bandwidth = 0.2299  
Shapiro-Wilk (BH-adj.): p = 0.317

**B4.IL.15**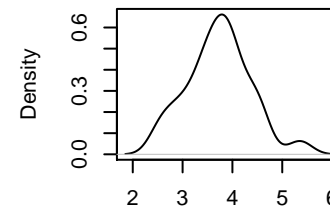

N = 27 Bandwidth = 0.2371  
Shapiro-Wilk (BH-adj.): p = 0.863

**B5.IL.18**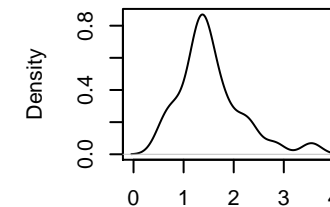

N = 29 Bandwidth = 0.1995  
Shapiro-Wilk (BH-adj.): p = 0.225

**B6.IL.11**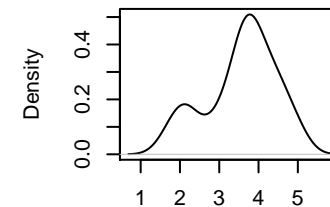

N = 28 Bandwidth = 0.3378  
Shapiro-Wilk (BH-adj.): p = 0.388

**B7.IL.27**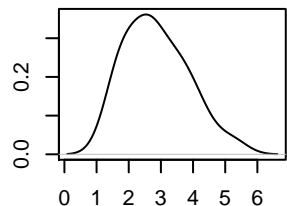

N = 23 Bandwidth = 0.4714  
Shapiro-Wilk (BH-adj.): p = 0.512

**B9.IL.33**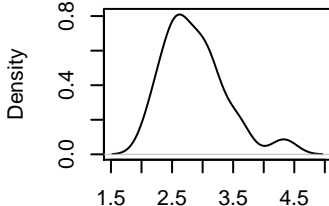

N = 22 Bandwidth = 0.2103  
Shapiro-Wilk (BH-adj.): p = 0.355

**A4.IL.5**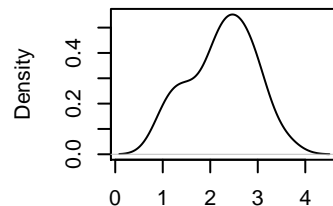

N = 28 Bandwidth = 0.3074  
Shapiro-Wilk (BH-adj.): p = 0.55

**A5.IL.13**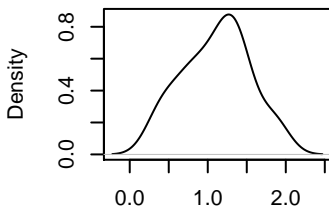

N = 29 Bandwidth = 0.196  
Shapiro-Wilk (BH-adj.): p = 0.55

**A6.IL.2**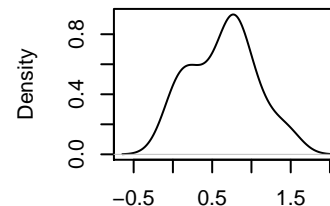

N = 29 Bandwidth = 0.1906  
Shapiro-Wilk (BH-adj.): p = 0.512

**A7.IL.6**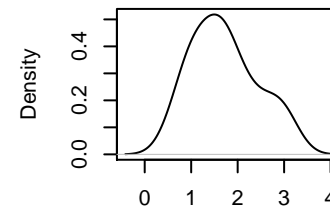

N = 24 Bandwidth = 0.3388  
Shapiro-Wilk (BH-adj.): p = 0.512

**A8.IL.9**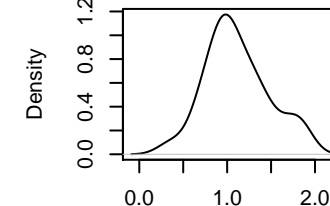

N = 28 Bandwidth = 0.1495  
Shapiro-Wilk (BH-adj.): p = 0.55

**A10.IL.10**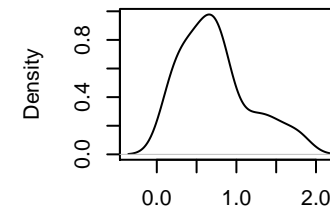

N = 19 Bandwidth = 0.1688  
Shapiro-Wilk (BH-adj.): p = 0.416

**B2.IFN.y**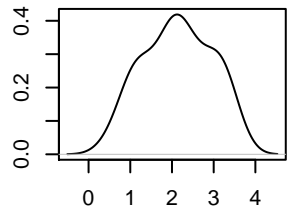

N = 29 Bandwidth = 0.3714  
Shapiro-Wilk (BH-adj.): p = 0.512

**B3.TNF.a**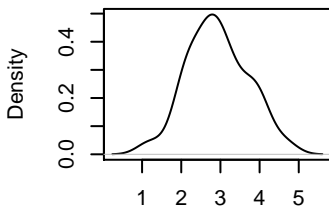

N = 29 Bandwidth = 0.3201  
Shapiro-Wilk (BH-adj.): p = 0.968

**B4.IL.17a**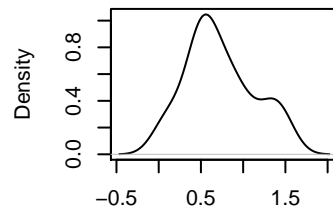

N = 29 Bandwidth = 0.162  
Shapiro-Wilk (BH-adj.): p = 0.512

**B5.IL.17F**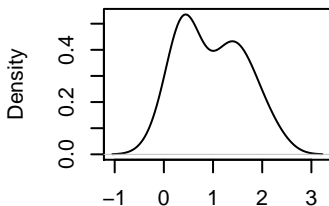

N = 24 Bandwidth = 0.3144  
Shapiro-Wilk (BH-adj.): p = 0.476

**B6.IL.4**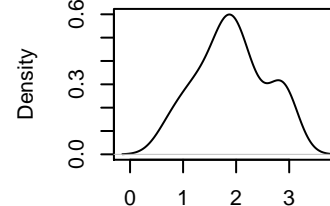

N = 29 Bandwidth = 0.2763  
Shapiro-Wilk (BH-adj.): p = 0.512

**B7.IL.21**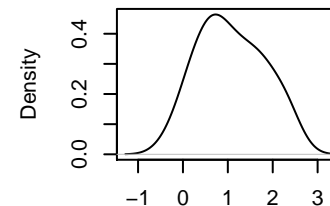

N = 29 Bandwidth = 0.3365  
Shapiro-Wilk (BH-adj.): p = 0.55

**B9.IL.22**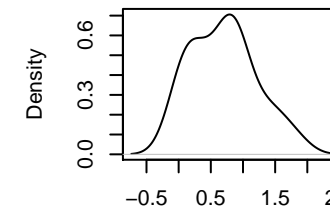

N = 20 Bandwidth = 0.2453  
Shapiro-Wilk (BH-adj.): p = 0.512
